# Supplementary material for: NaCT/SLC13A5 facilitates citrate import and metabolism under nutrient-limited conditions
Source: PubMed Central journal article supplement (PMC8500708; doi:10.1016/j.celrep.2021.109701), 2021-09-14
Supplement: NIHMS1742219-supplement-Supplementary_figures_and_tables.pdf [file NIHMS1742219-supplement-Supplementary_figures_and_tables.pdf]

**Cell Reports, Volume 36**

**Supplemental information**

**NaCT/SLC13A5 facilitates citrate import  
and metabolism under nutrient-limited conditions**

**Avi Kumar, Thekla Cordes, Anna E. Thalacker-Mercer, Ana M. Pajor, Anne N. Murphy, and Christian M. Metallo**

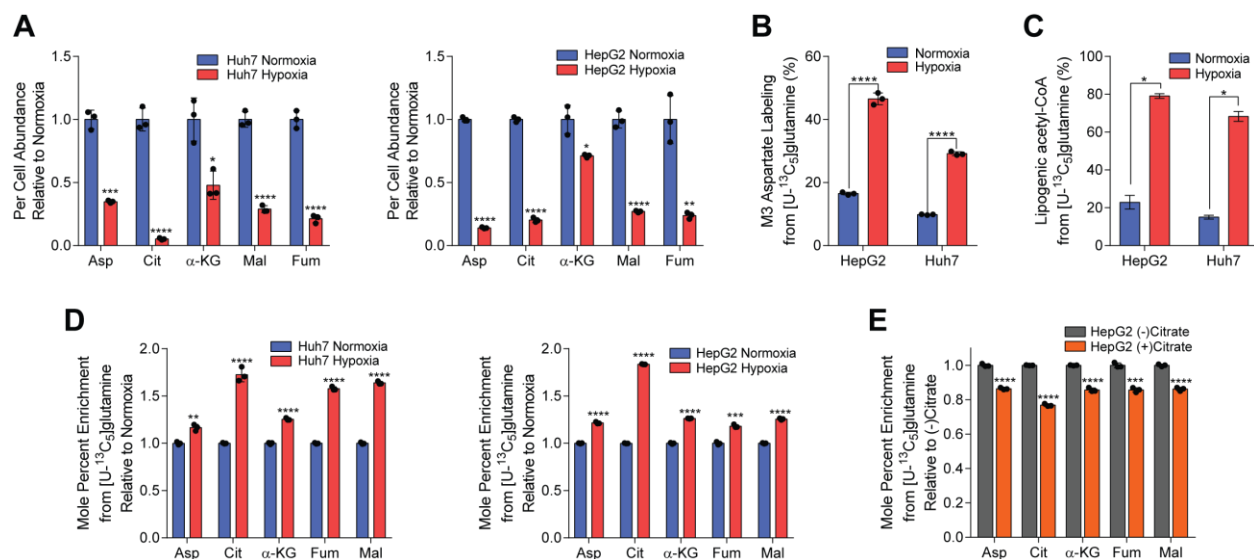

**Supplementary Figure 1. Citrate dilutes central carbon pathway labeling in hepatocellular carcinoma and neuronal cells in hypoxia. Related to Figure 2.**

(A) Per cell abundances of TCA intermediates in Huh7 (left) and HepG2 (right) cells grown in normoxia or hypoxia for 48 hours, relative to normoxia (n=3).

(B) Percent labeling of M3 aspartate from [U-<sup>13</sup>C<sub>5</sub>]glutamine in HepG2 and Huh7 cells grown in normoxia or hypoxia for 48 hours (n=3).

(C) Percent of lipogenic acetyl-CoA contributed by [U-<sup>13</sup>C<sub>5</sub>]glutamine in HepG2 and Huh7 cells grown in normoxia or hypoxia for 48 hours (n=3).

(D) Mole percent enrichment of TCA intermediates from [U-<sup>13</sup>C<sub>5</sub>]glutamine in Huh7 (left) and HepG2 (right) cells grown in normoxia or hypoxia for 48 hours, relative to normoxia (n=3).

(E) Mole percent enrichment of TCA intermediates from [U-<sup>13</sup>C<sub>5</sub>]glutamine in HepG2 cells grown in hypoxia +/- 500 μM citrate for 48 hours, relative to (-) citrate (n=3).

Asp, aspartate; Cit, citrate; α-KG, α-ketoglutarate; Fum, fumarate; Mal, malate. In (A,B,D,E) data are plotted as mean ± SD. Statistical significance is relative to normoxia (A,B,D) or (-) citrate (E) as determined by two-sided Student's t-test with \*, P value < 0.05; \*\*, P value < 0.01; \*\*\*, P value < 0.001, \*\*\*\*, P value < 0.0001. In (C) data are plotted as mean ± 95% confidence interval (CI). Statistical significance by non-overlapping confidence intervals, \*. Unless indicated, all data represent biological triplicates. Data shown are from one of at least two separate experiments.

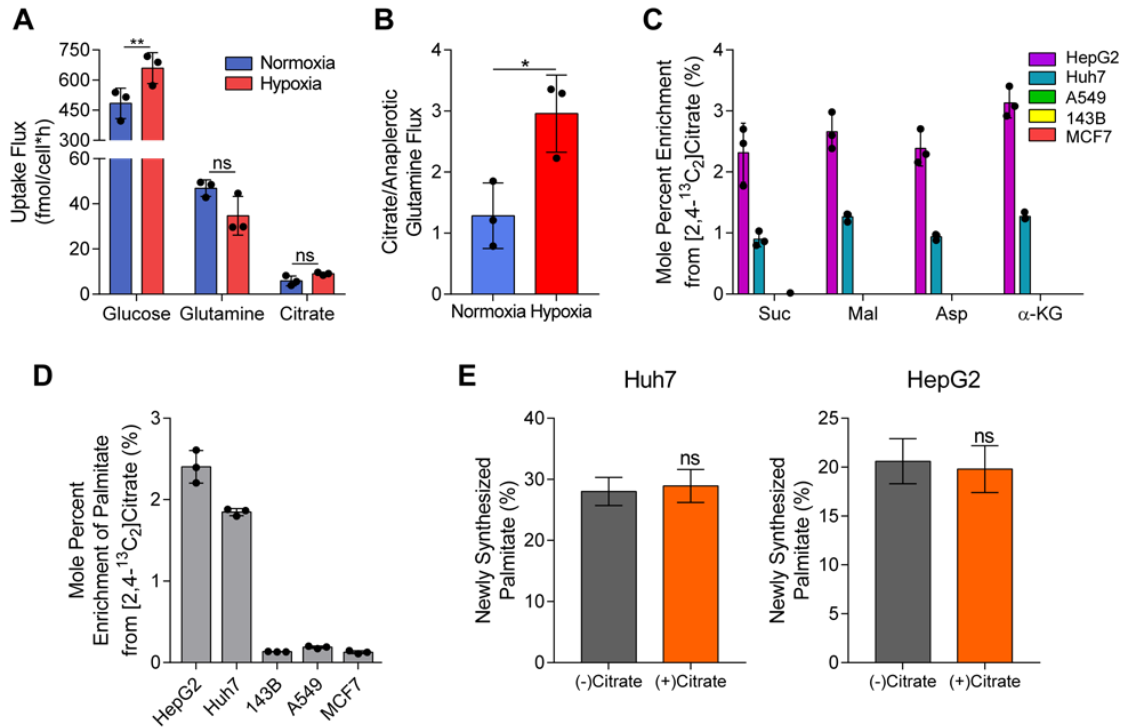

**Supplemental Figure 2. Exogenous citrate is metabolized for TCA anaplerosis and fatty acid synthesis. Related to Figure 3.**

(A) Glucose, glutamine, and citrate uptake flux over 48 hours in Huh7 cells grown in normoxia or hypoxia (n=3).

(B) Ratio of net citrate to anaplerotic glutamine flux over 48 hours in Huh7 cells grown in normoxia or hypoxia. Anaplerotic flux of glutamine calculated by subtracting media glutamate efflux from glutamine uptake (n=3).

(C) Mole percent enrichment of TCA intermediates from 500  $\mu\text{M}$  [2,4- $^{13}\text{C}_2$ ]citrate in cancer cells grown in hypoxia for 48 hours (n=3).

(D) Palmitate mole percent enrichment from 500  $\mu\text{M}$  [2,4- $^{13}\text{C}_2$ ]citrate in cancer cells grown in hypoxia for 48 hours (n=3).

(E) De novo synthesis of palmitate +/- 500  $\mu\text{M}$  citrate in Huh7 (left) and HepG2 (right) cells grown in hypoxia over 48 hours (n=3).

Suc, succinate; Mal, malate; Asp, aspartate;  $\alpha$ -KG,  $\alpha$ -ketoglutarate. In (A-D) data are plotted as mean  $\pm$  SD. Unless indicated, all data represent biological triplicates. Statistical significance is relative to normoxia (A,B) as determined by two-sided Student's t-test with \*, P value < 0.05; \*\*, P value < 0.01; \*\*\*, P value < 0.001, \*\*\*\*, P value < 0.0001. In (E) data are plotted as mean  $\pm$  95% confidence interval (CI). Statistical significance by non-overlapping confidence intervals, \*. Data shown are from one of at least two separate experiments.

### Huh7 *SLC13A5*-KO #1

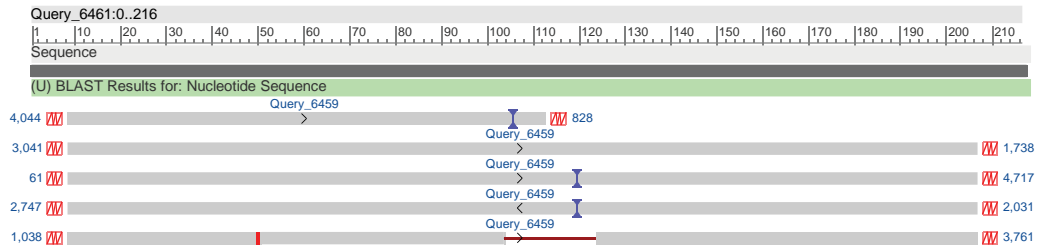

### Huh7 *SLC13A5*-KO #2

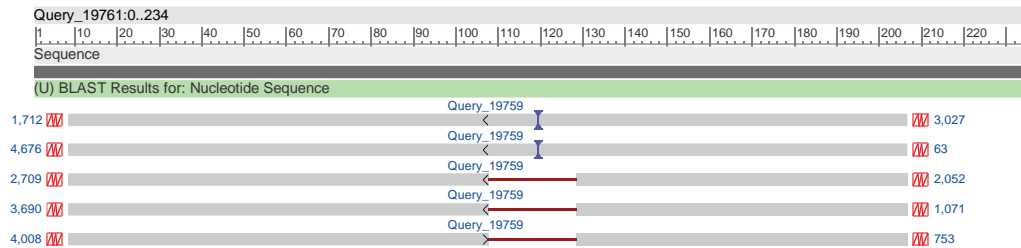

### HepG2 *SLC13A5*-KO #1

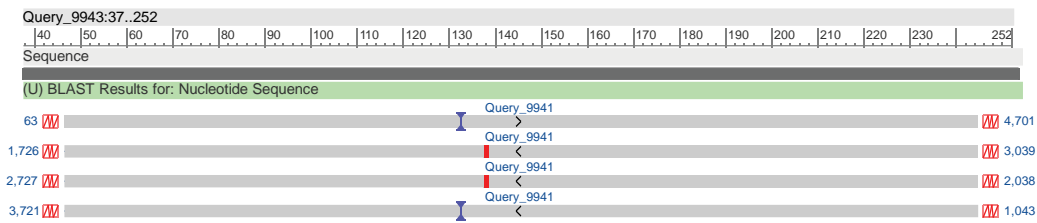

### HepG2 *SLC13A5*-KO #2

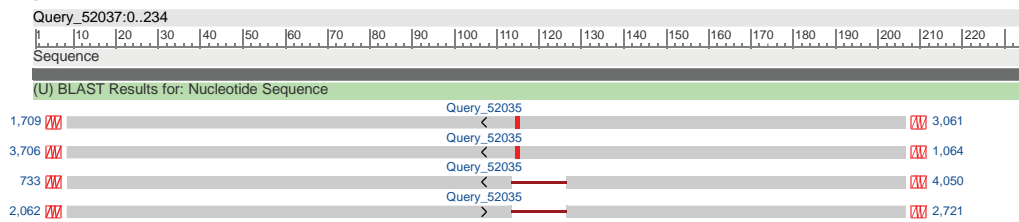

## Supplemental Figure 3. Alignment of DNA sequences obtained from CRISPR/Cas9 HCC *SLC13A5*-KO clones. Related to Figure 5.

Sequences aligned using NCBI BLASTN suite (Agarwala et al., 2018). Results were visualized using NCBI Viewer 3.41.1.

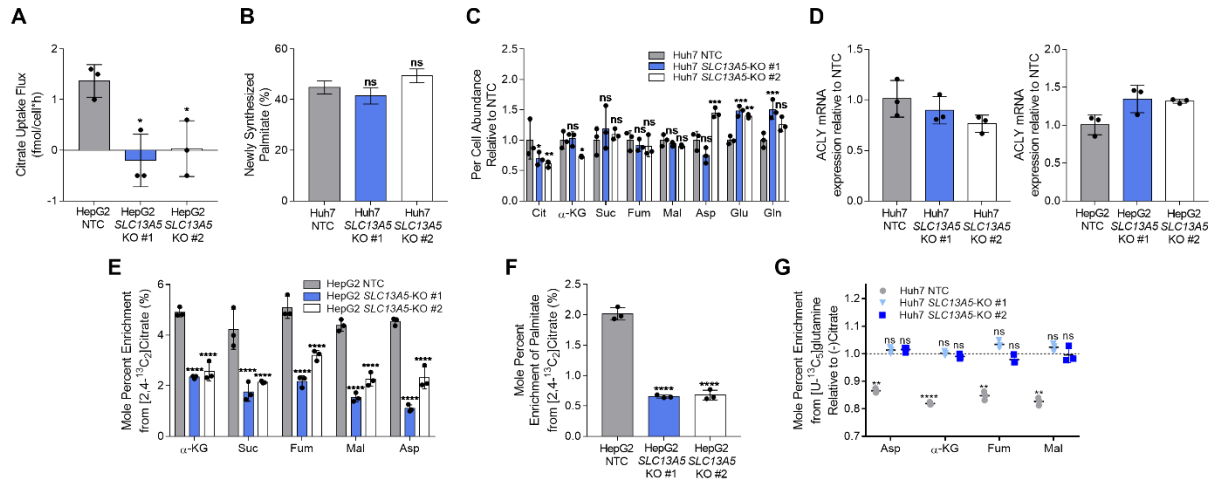

**Supplemental Figure 4. NaCT supports extracellular citrate import and metabolism in hepatocellular carcinoma cells. Related to Figure 5.**

- (A) Citrate uptake flux in HepG2 NTC and *SLC13A5*-KO cells grown in hypoxia for 48 hours (n=3).
- (B) De novo synthesis of palmitate in Huh7 NTC and *SLC13A5*-KO cells grown in hypoxia for 48 hours (n=3).
- (C) Per cell abundance of metabolites in Huh7 NTC and *SLC13A5*-KO cells grown in hypoxia for 48 hours, relative to NTC (n=3).
- (D) ACLY mRNA expression in NTC and *SLC13A5*-KO Huh7 (left) and HepG2 (right) cells grown in normoxia, relative to NTC (n=3).
- (E) Mole percent enrichment of TCA intermediates from [2,4-<sup>13</sup>C<sub>2</sub>]citrate in HepG2 NTC and *SLC13A5*-KO cells grown in hypoxia for 48 hours (n=3).
- (F) Mole percent enrichment of palmitate from [2,4-<sup>13</sup>C<sub>2</sub>]citrate in HepG2 NTC and *SLC13A5*-KO cells grown in hypoxia for 48 hours (n=3).
- (G) Mole percent enrichment of TCA intermediates from [U-<sup>13</sup>C<sub>5</sub>]glutamine in Huh7 NTC and *SLC13A5*-KO cells +/- 500 μM citrate grown in hypoxia for 48 hours, relative to (-) citrate (n=3).

Cit, citrate;  $\alpha$ -KG,  $\alpha$ -ketoglutarate; Suc, succinate; Fum, fumarate; Mal, malate; Asp, aspartate; Glu, glutamate; Gln, glutamine. In (A,C-F) all graphs data are plotted as mean  $\pm$  SD. Statistical significance is relative to NTC as determined by One-way ANOVA w/ Dunnet's method for multiple comparisons (A,C-F) or relative to (-) citrate as determined by two-sided Student's t-test (G) with \*, P value < 0.05; \*\*, P value < 0.01; \*\*\*, P value < 0.001, \*\*\*\*, P value < 0.0001. In (B) data are plotted as mean  $\pm$  95% confidence interval (CI). Statistical significance by non-overlapping confidence intervals, \*. Unless indicated, all data represent biological triplicates. Data shown are from one of at least two separate experiments.

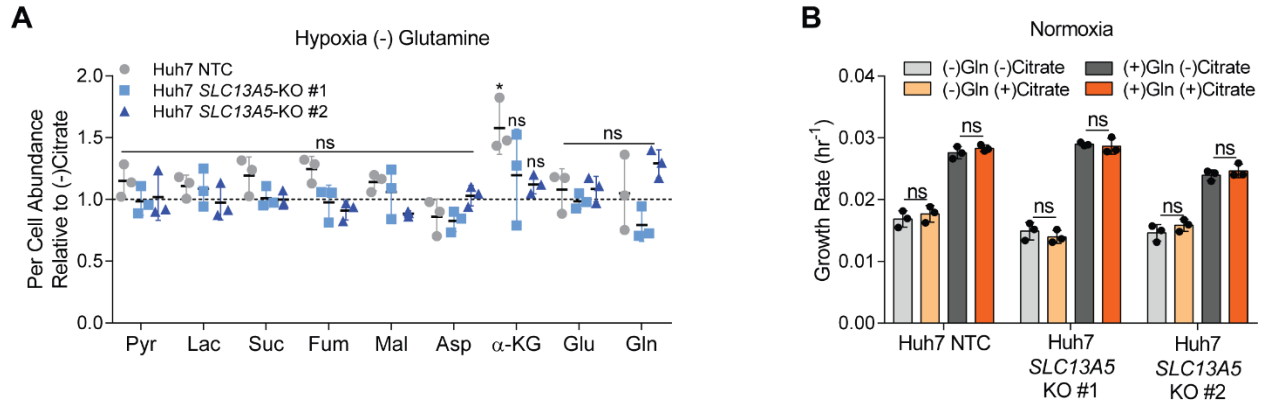

**Supplemental Figure 5. NaCT facilitates growth under nutrient stress and resistance to zinc toxicity. Related to Figure 6.**

(A) Per cell abundances of central carbon metabolites in Huh7 NTC and *SLC13A5*-KO cells grown without glutamine in hypoxia +/- 500  $\mu\text{M}$  citrate for 48 hours, relative to (-) citrate (n=3).

(B) Growth rates of Huh7 NTC and *SLC13A5*-KO cells grown in high glucose DMEM +/- 4mM glutamine +/- 500  $\mu\text{M}$  citrate in normoxia for 4 days (n=3).

Pyr, pyruvate; Lac, lactate; Suc, succinate; Fum, fumarate; Mal, malate; Asp, aspartate;  $\alpha$ -KG,  $\alpha$ -ketoglutarate; Glu, glutamate; Gln, glutamine. In all graphs data are plotted as mean  $\pm$  SD. Statistical significance is determined by two-sided Student's t-test relative to (-) citrate (A); or determined by Two-way ANOVA w/ Tukey's method for multiple comparisons relative to (-) citrate (B) with \*, P value < 0.05; \*\*, P value < 0.01; \*\*\*, P value < 0.001, \*\*\*\*, P value < 0.0001. Unless indicated, all data represent biological triplicates. Data shown are from one of at least two separate experiments.

**Table S1. Oligonucleotide sequences used in this study. Related to Figures 1 and 5.**

| Primer Name             | Sequence                 | Application            |
|-------------------------|--------------------------|------------------------|
| ACLY (human) fwd        | TCGGCCAAGGCAATTTTCAGAG   | qRT-PCR                |
| ACLY (human) rev        | CGAGCATACTTGAACCGATTCT   | qRT-PCR                |
| SLC13A5 (human) fwd     | CTGCCACTCGTCATTCTGATG    | qRT-PCR                |
| SLC13A5 (human) rev     | ATGTTGGTGTCCCTTCATGTACTG | qRT-PCR                |
| r18s (human) fwd        | AGTCCCTGCCCTTTGTACACA    | qRT-PCR                |
| r18s (human) rev        | CGATCCGAGGGCCTCACTA      | qRT-PCR                |
| Slc13a5 (rat) fwd       | GGTGCACAGATGTCATCCCA     | qRT-PCR                |
| Slc13a5 (rat) rev       | AGCATGTTGGTGTCCGTCAT     | qRT-PCR                |
| r18s (rat) fwd          | AGAAACGGCTACCACATCCA     | qRT-PCR                |
| r18s (rat) rev          | CTCGAAAGAGTCCTGTATTGT    | qRT-PCR                |
| SLC13A5 (human) PCR fwd | AGGCATCCCATAGTGACCCT     | Target Site PCR Primer |
| SLC13A5 (human) PCR rev | CACAGAACTGCCGGAGTTGT     | Target Site PCR Primer |
| sgRNA-NTC-fwd           | GGCCGTGTTGCTGGATACGCC    | CRISPR/Cas9            |
| sgRNA-NTC-rev           | GGCGTATCCAGCAACACGGCC    | CRISPR/Cas9            |
| sgRNA-SLC13A5-fwd       | AGGCACAATGAATAGCAGGG     | CRISPR/Cas9            |
| sgRNA-SLC13A5-rev       | CCCTGCTATTCATTGTGCCT     | CRISPR/Cas9            |

**Table S2. MFA of compartmental citrate catabolism in Huh7 hepatoma cells grown under hypoxia. Related to Figure 4.**

| <b>Pathway/Reaction</b>                                          | <b>Flux<br/>(fmol/cell/hr)</b> | <b>Lower bound<br/>(fmol/cell/hr)</b> | <b>Upper bound<br/>(fmol/cell/hr)</b> |
|------------------------------------------------------------------|--------------------------------|---------------------------------------|---------------------------------------|
| <b>Glycolysis (net fluxes)</b>                                   |                                |                                       |                                       |
| Glc.x -> G6P                                                     | 682                            | 644.7                                 | 749.4                                 |
| G6P -> F6P                                                       | 682                            | 264.1                                 | 719.3                                 |
| F6P -> DHAP + GAP                                                | 681                            | 593.1                                 | 714.9                                 |
| DHAP -> GAP                                                      | 681                            | 593.1                                 | 714.9                                 |
| GAP -> 3PG                                                       | 1362                           | 1245                                  | 1475                                  |
| 3PG -> PEP                                                       | 1362                           | 1245                                  | 1475                                  |
| PEP -> Pyr.c                                                     | 1362                           | 1245                                  | 1475                                  |
| Pyr.c -> Lac                                                     | 1375                           | 1306                                  | 1449                                  |
| Lac -> Lac.x                                                     | 1375                           | 1306                                  | 1449                                  |
| Pyr.c -> Ala                                                     | 3.589                          | 3.176                                 | 3.981                                 |
| Pyr.m -> Ala                                                     | 0.1301                         | 0.05217                               | 0.1871                                |
| <b>Pentose Phosphate Pathway (net fluxes)</b>                    |                                |                                       |                                       |
| G6P -> P5P + CO2                                                 | 1.00E-07                       | 0                                     | 430.2                                 |
| P5P + P5P -> S7P + GAP                                           | -0.4812                        | -0.5423                               | 161.2                                 |
| S7P + GAP -> F6P + E4P                                           | -0.4812                        | -0.5423                               | 161.2                                 |
| P5P + E4P -> F6P + GAP                                           | -0.4812                        | -0.5423                               | 161.2                                 |
| <b>Pyruvate Oxidation and Anaplerotic Reactions (net fluxes)</b> |                                |                                       |                                       |
| Cit.x -> Cit.e                                                   | 9.648                          | 9.099                                 | 10.42                                 |
| Cit.e -> Cit.c                                                   | 10.01                          | 9.458                                 | 10.78                                 |
| Pyr.c -> Pyr.m                                                   | 4.631                          | 4.097                                 | 5.264                                 |
| Pyr.m + CO2 -> Oac.m                                             | 14.54                          | 11.97                                 | 18.54                                 |
| Mal.m -> Pyr.m + CO2                                             | 19.9                           | 15.9                                  | 22.68                                 |
| Mal.c -> Pyr.c + CO2                                             | 21.51                          | 18.46                                 | 24.92                                 |
| Pyr.m -> AcCoA.m + CO2                                           | 9.862                          | 7.82                                  | 11.71                                 |
| FAO -> AcCoA.m                                                   | 7.791                          | 5.094                                 | 9.553                                 |
| Glu.m -> $\alpha$ -KG.m                                          | -2.385                         | -10.69                                | 45.04                                 |
| Gln -> Glu.c                                                     | 27.7                           | 27.39                                 | 28.14                                 |
| Gln.x -> Gln                                                     | 29.69                          | 29.53                                 | 29.86                                 |
| Glu.c -> Glu.x                                                   | 3.914                          | 1.731                                 | 5.86                                  |
| Glu.c -> Glu.m                                                   | -4.74E-11                      | -8.364                                | 54.98                                 |
| $\alpha$ -KG.c -> Glu.c                                          | -21.4                          | -30.19                                | 32.48                                 |
| $\alpha$ -KG.m -> $\alpha$ -KG.c                                 | -34.07                         | -42.24                                | -26.44                                |
| <b>TCA Cycle (net fluxes)</b>                                    |                                |                                       |                                       |
| AcCoA.m + Oac.m -> Cit.m                                         | 17.65                          | 15.99                                 | 19.19                                 |
| Cit.m -> $\alpha$ -KG.m + CO2                                    | -0.5944                        | -1.901                                | 1.646                                 |
| $\alpha$ -KG.m -> Suc + CO2                                      | 31.09                          | 26.99                                 | 34.96                                 |



|                               |           |          |        |
|-------------------------------|-----------|----------|--------|
| Suc -> Fum.m                  | 31.09     | 26.99    | 34.96  |
| Fum.m -> Mal.m                | 31.09     | 26.99    | 34.96  |
| Mal.m -> Oac.m                | 5.665     | -0.3408  | 9.143  |
| Oac.m -> Asp.m                | 2.553     | -1.954   | 4.303  |
| Mal.c -> Oac.c                | -2.83E-14 | -17.13   | 4.285  |
| Oac.c -> Asp.c                | 15.22     | 0.2183   | 17.8   |
| Asp.c -> Fum.c                | 15.99     | 2.24E-13 | 18.6   |
| Mal.c -> Fum.c                | -15.99    | -18.6    | 0      |
| Mal.c -> Mal.m                | -5.527    | -14.49   | -1.005 |
| Asp.m -> Asp.c                | 2.553     | -1.954   | 4.303  |
| Cit.c -> $\alpha$ -KG.c + CO2 | 12.67     | 10.98    | 14.97  |
| Cit.m -> Cit.c                | 18.25     | 16.38    | 20.73  |

### Biomass

|                                                                                                               |         |         |         |
|---------------------------------------------------------------------------------------------------------------|---------|---------|---------|
| Cit.c -> AcCoA.c + Oac.c                                                                                      | 15.22   | 12.6    | 16.9    |
| 0*AcCoA.c + 0*AcCoA.c + 0*AcCoA.c +<br>0*AcCoA.c + 0*AcCoA.c + 0*AcCoA.c +<br>0*AcCoA.c + 0*AcCoA.c -> Palm.s | 0.00769 | 0       | Inf     |
| Palm.d -> Palm.s                                                                                              | 0.1254  | 0       | Inf     |
| 114*Asp.c + 152*Glu.c + 152*Glu.m +<br>237*Ala + 127*Gln + 970*AcCoA.c +<br>92*P5P -> Biomass                 | 0.01569 | 0.01299 | 0.01742 |

### Dilution/Mixing

|                                       |          |          |         |
|---------------------------------------|----------|----------|---------|
| 0*Pyr.c -> Pyr.mnt                    | 0.9488   | 0.9335   | 0.9643  |
| 0*Pyr.m -> Pyr.mnt                    | 0.05123  | 0.03573  | 0.06649 |
| 0*Mal.c -> Mal.mnt                    | 0.02303  | 1.00E-07 | 0.09788 |
| 0*Mal.m -> Mal.mnt                    | 0.977    | 0.9021   | 1       |
| 0*Asp.c -> Asp.mnt                    | 1        | 1.00E-07 | 1       |
| 0*Asp.m -> Asp.mnt                    | 1.00E-07 | 0        | 1       |
| 0*Fum.m -> Fum.mnt                    | 0.8298   | 0.6784   | 0.9363  |
| 0*Fum.c -> Fum.mnt                    | 0.1702   | 0.0637   | 0.3216  |
| 0*Cit.m -> Cit.mnt                    | 0.1439   | 1.00E-07 | 1       |
| 0*Cit.c -> Cit.mnt                    | 0.8561   | 0        | 1       |
| 0*Glu.m -> Glu.mnt                    | 1        | 0.9606   | 1       |
| 0*Glu.c -> Glu.mnt                    | 1.00E-07 | 0        | 0.03941 |
| 0* $\alpha$ -KG.m -> $\alpha$ -KG.mnt | 0.4998   | 1.00E-07 | 1       |
| 0* $\alpha$ -KG.c -> $\alpha$ -KG.mnt | 0.5002   | 0        | 1       |
| Pyr.mnt -> Pyr.fix                    | 1        | 1        | 1       |
| Asp.mnt -> Asp.fix                    | 1        | 1        | 1       |
| Mal.mnt -> Mal.fix                    | 1        | 1        | 1       |
| Fum.mnt -> Fum.fix                    | 1        | 1        | 1       |
| Cit.mnt -> Cit.fix                    | 1        | 1        | 1       |
| $\alpha$ -KG.mnt -> $\alpha$ -KG.fix  | 1        | 1        | 1       |

|                                                    |          |        |       |
|----------------------------------------------------|----------|--------|-------|
| Glu.mnt -> Glu.fix                                 | 1        | 1      | 1     |
| <b>Glycolysis (exchange fluxes)</b>                |          |        |       |
| G6P <- F6P                                         | 1.00E-07 | 0      | Inf   |
| DHAP <- GAP                                        | 0.00932  | 0      | Inf   |
| GAP <- 3PG                                         | 24.34    | 0      | Inf   |
| Pyr.c <- Lac                                       | 1.00E-07 | 0      | Inf   |
| <b>Pentose Phosphate Pathway (exchange fluxes)</b> |          |        |       |
| P5P + P5P <- S7P + GAP                             | 1.00E-07 | 0      | Inf   |
| S7P + GAP <- F6P + E4P                             | 1.00E-07 | 0      | Inf   |
| P5P + E4P <- F6P + GAP                             | 301.1    | 0      | Inf   |
| <b>Anaplerotic Reactions (exchange fluxes)</b>     |          |        |       |
| Cit.e <- Cit.c                                     | 0.3594   | 0.3217 | 0.382 |
| Glu.m <- $\alpha$ -KG.m                            | 1.563    | 0      | Inf   |
| Glu.c <- Glu.m                                     | 1.00E-07 | 0      | 61.6  |
| $\alpha$ -KG.c <- Glu.c                            | 1.00E-07 | 0      | Inf   |
| $\alpha$ -KG.m <- $\alpha$ -KG.c                   | 157.6    | 0      | Inf   |
| <b>TCA Cycle (exchange fluxes)</b>                 |          |        |       |
| Cit.m <- $\alpha$ -KG.m + CO2                      | 1.00E-07 | 0      | 2.92  |
| Suc <- Fum.m                                       | 0.001999 | 0      | Inf   |
| Fum.m <- Mal.m                                     | 3.35E+05 | 364.3  | Inf   |
| Mal.m <- Oac.m                                     | 69.2     | 32.19  | 178.2 |
| Oac.m <- Asp.m                                     | 1.00E-07 | 0      | Inf   |
| Mal.c <- Oac.c                                     | 1.00E-07 | 0      | Inf   |
| Oac.c <- Asp.c                                     | 0.05184  | 0      | Inf   |
| Mal.c <- Fum.c                                     | 1768     | 0      | Inf   |
| Mal.c <- Mal.m                                     | 1.00E-07 | 0      | 4.497 |
| Asp.m <- Asp.c                                     | 0.3676   | 0      | Inf   |
| Cit.c <- $\alpha$ -KG.c + CO2                      | 1.00E-07 | 0      | 2.124 |
| Cit.m <- Cit.c                                     | 1.00E-07 | 0      | Inf   |

SSR = 170.4

Expected SSR = [141.2 214.6] (95.0% conf., 176 DOF)

Compartment abbreviations: **c**, cytosol; **m**, mitochondrial; **mnt**, measured (utilized to indicate that measured MIDs reflect aggregated metabolite labeling across all compartments); **x**, extracellular; **e**, extracellular exchange intermediate (utilized in order to allow for incorporation of both citrate uptake and efflux).

**Table S3. Metabolite fragments considered in MFA. Related to Figure 4.**

| <b>Metabolite</b> | <b>Carbons</b> | <b>Formula</b>                                                                | <b>m/z</b> |
|-------------------|----------------|-------------------------------------------------------------------------------|------------|
| Pyruvate          | 1,2,3          | C <sub>6</sub> H <sub>12</sub> O <sub>3</sub> NSi                             | 174        |
| Lactate           | 2,3            | C <sub>10</sub> H <sub>25</sub> O <sub>2</sub> Si <sub>2</sub>                | 233        |
| Lactate           | 1,2,3          | C <sub>11</sub> H <sub>25</sub> O <sub>3</sub> Si <sub>2</sub>                | 261        |
| Alanine           | 2,3            | C <sub>10</sub> H <sub>26</sub> ONSi <sub>2</sub>                             | 232        |
| Alanine           | 1,2,3          | C <sub>11</sub> H <sub>26</sub> O <sub>2</sub> NSi <sub>2</sub>               | 260        |
| α-KG              | 1,2,3,4,5      | C <sub>14</sub> H <sub>28</sub> O <sub>5</sub> NSi <sub>2</sub>               | 346        |
| Malate            | 1,2,3,4        | C <sub>18</sub> H <sub>39</sub> O <sub>5</sub> Si <sub>3</sub>                | 419        |
| Succinate         | 1,2,3,4        | C <sub>12</sub> H <sub>25</sub> O <sub>4</sub> Si <sub>2</sub>                | 289        |
| Fumarate          | 1,2,3,4        | C <sub>12</sub> H <sub>23</sub> O <sub>4</sub> Si <sub>2</sub>                | 287        |
| Aspartate         | 1,2            | C <sub>14</sub> H <sub>32</sub> O <sub>2</sub> NSi <sub>2</sub>               | 302        |
| Glutamate         | 1,2,3,4,5      | C <sub>19</sub> H <sub>42</sub> O <sub>4</sub> NSi <sub>3</sub>               | 432        |
| Glutamine         | 1,2,3,4,5      | C <sub>19</sub> H <sub>43</sub> O <sub>3</sub> N <sub>2</sub> Si <sub>3</sub> | 431        |
| Palmitate         | 1-16           | C <sub>17</sub> H <sub>34</sub> O <sub>2</sub>                                | 270        |
